# Supplementary material for: The synergistic effect of CDKN2B-AS1 and SPC25 on triple-negative breast cancer
Source: PubMed Central journal article supplement — Ann Transl Med. 2022 Jul;10(14):783. doi: 10.21037/atm-22-2900 (PMC9372695; doi:10.21037/atm-22-2900), 2022-07
Supplement: atm-10-14-783-dss.pdf [file atm-10-14-783-dss.pdf]

## Data Sharing Statement

|                     |                                                                                                                                                     |                                                                                                                             |
|---------------------|-----------------------------------------------------------------------------------------------------------------------------------------------------|-----------------------------------------------------------------------------------------------------------------------------|
| <b>Article Info</b> | <a href="https://dx.doi.org/10.21037/atm-22-2900">https://dx.doi.org/10.21037/atm-22-2900</a>                                                       |                                                                                                                             |
| <b>Item</b>         | <b>Question</b>                                                                                                                                     | <b>Authors' Response<br/>(place "-" if not applicable)</b>                                                                  |
| 1                   | Would you like to share data collected for your study to others?                                                                                    | No.                                                                                                                         |
| 2                   | If not, would you like to share the reason for your decision?                                                                                       | -                                                                                                                           |
| 3                   | What data in particular will be shared?                                                                                                             | -                                                                                                                           |
| 4                   | Any other documents will be shared? Such as study protocol, statistical analysis plan, informed consent form, clinical study report, analytic code. | Analytic code will be shared if requested.                                                                                  |
| 5                   | When will data availability begin?                                                                                                                  | From the publication date.                                                                                                  |
| 6                   | When will data availability end?                                                                                                                    | Two years within the publication date, since the code may be updated over time.                                             |
| 7                   | To whom will you share the data?                                                                                                                    | Medical oncologists and breast surgeons who are interested in studies of TNBC.                                              |
| 8                   | For what type of analysis or purpose?                                                                                                               | For analysis to evaluate the biomarkers of TNBC patients.                                                                   |
| 9                   | How or where can the data/documents be obtained?                                                                                                    | Emails could be sent to the address below to obtain the shared data: <a href="mailto:ndeng@cmu.edu.cn">ndeng@cmu.edu.cn</a> |
| 10                  | Any other restrictions?                                                                                                                             | We may balance the potential benefits and risks for each request and then provide the data that could be shared.            |
