# Supplementary material for: The synergistic effect of CDKN2B-AS1 and SPC25 on triple-negative breast cancer
Source: PubMed Central journal article supplement — Ann Transl Med. 2022 Jul;10(14):783. doi: 10.21037/atm-22-2900 (PMC9372695; doi:10.21037/atm-22-2900), 2022-07
Supplement: atm-10-14-783-supplementary.pdf [file atm-10-14-783-supplementary.pdf]

**Table S1** Primers used for RT-PCR

| Gene                     | Forward (5'-3')      | Reverse (5'-3')       |
|--------------------------|----------------------|-----------------------|
| <i>LncRNA CDKN2B-AS1</i> | CCCTCGTCGAAAGTCTTCCA | GAGCAATGAGATGACCTCGCT |
| <i>SPC25</i>             | ATGGTAGAGGACGAACTGGC | CAGGAGGTGTCCGTACTTTTG |

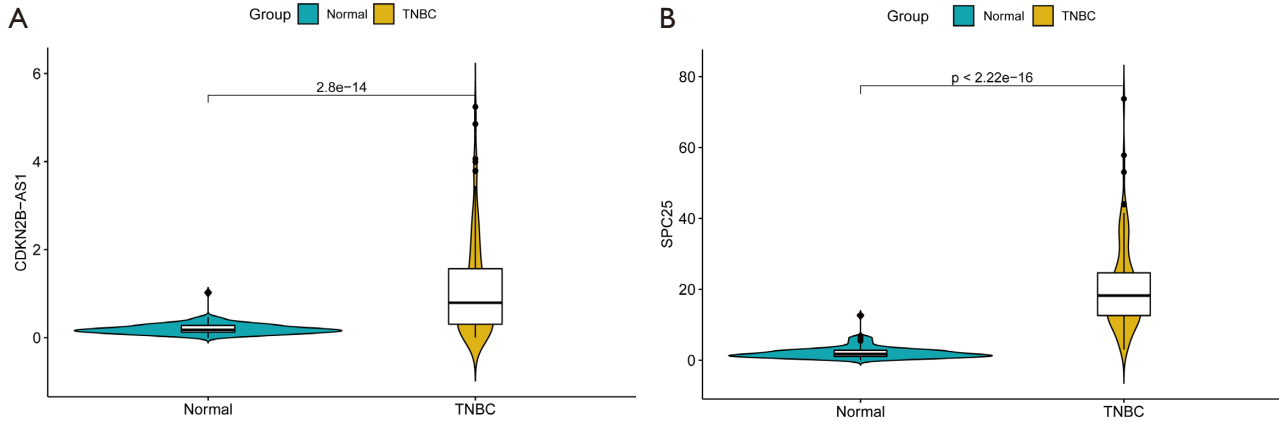

**Figure S1** CDKN2B-AS1 and SPC25 expression in brown module. (A) CDKN2B-AS1 expression in normal breast tissues and TNBC tissues. (B) SPC25 expression in normal breast tissues and TNBC tissues. TNBC, triple-negative breast cancer; SPC25, spindle component 25; CDKN2B-AS1, cyclin-dependent kinase inhibitor 2B antisense RNA 1.

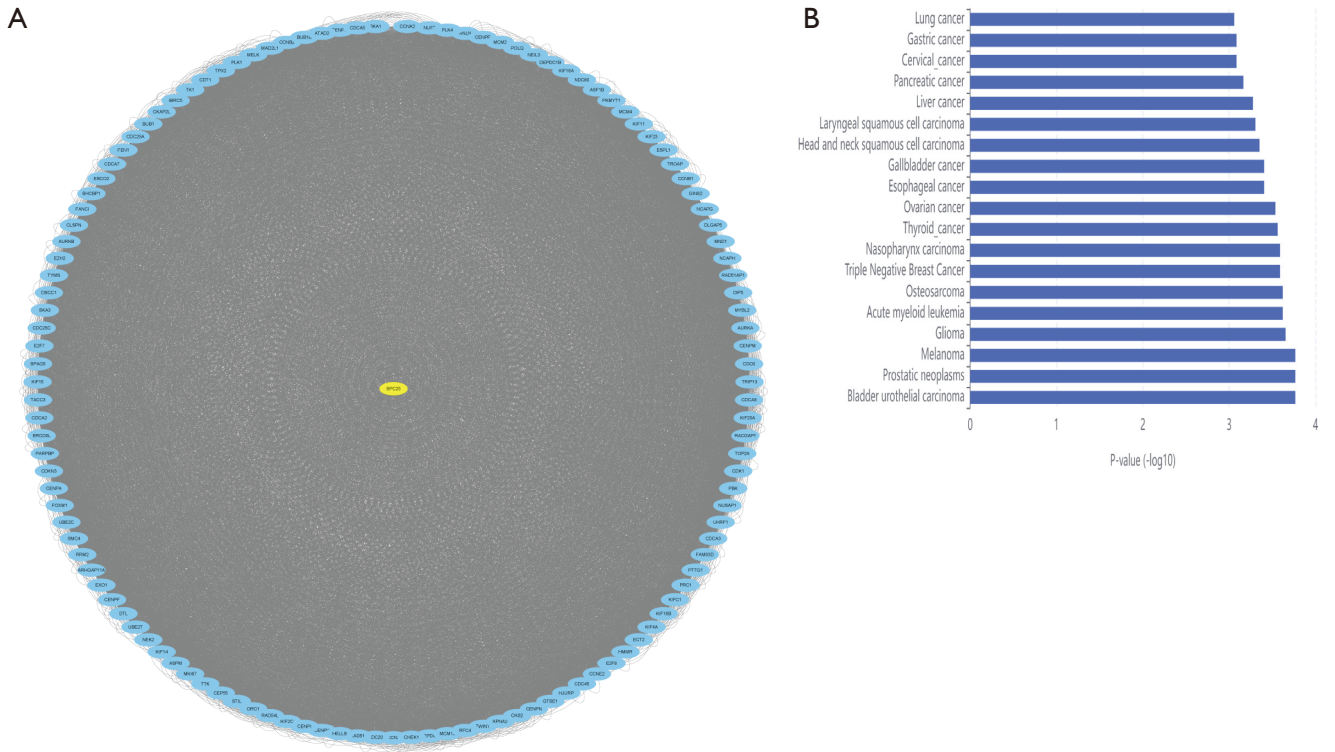

**Figure S2** Detection of hub genes in TNBC and enrichment analysis of CDKN2B-AS1. (A) SPC25 as a hub gene of TNBC screened by MCODE plugin in cytoscape; (B) enrichment of CDKN2B-AS1 in TNBC confirmed via LncSEA platform. TNBC, triple-negative breast cancer; SPC25, spindle component 25; CDKN2B-AS1, cyclin-dependent kinase inhibitor 2B antisense RNA 1; MCODE, Molecular Complex Detection.
